# Supplementary material for: Elevated miR-130a/miR130b/miR-152 expression reduces intracellular ATP levels in the pancreatic beta cell
Source: PubMed Central journal article supplement (PMC5362944; doi:10.1038/srep44986), 2017-03-23
Supplement: srep44986-s1.pdf [file srep44986-s1.pdf]

## SUPPLEMENTARY INFORMATION

### Elevated miR-130a/miR130b/miR-152 expression reduces intracellular ATP levels in the pancreatic beta cell

Jones K. Ofori<sup>1,3</sup>, Vishal A. Salunkhe<sup>1,3</sup>, Annika Bagge<sup>2,3</sup>, Neelanjan Vishnu<sup>2,3</sup>, Mototsugu Nagao<sup>1,3</sup>, Hindrik Mulder<sup>2,3</sup>, Claes B. Wollheim<sup>3,4</sup>, Lena Eliasson<sup>1,3\*</sup>, Jonathan L.S. Esguerra<sup>1,3\*</sup>

<sup>1</sup>Islet Cell Exocytosis, Department of Clinical Sciences-Malmö, Lund University, Malmö, 205 02, Sweden

<sup>2</sup>Molecular Metabolism, Department of Clinical Sciences-Malmö, Lund University, Malmö, 20502, Sweden

<sup>3</sup>Lund University Diabetes Centre, Skåne University Hospital, Lund and Malmö, Sweden

<sup>4</sup>Department of Cell Physiology and Metabolism, Faculty of Medicine, University of Geneva, Geneva, 1211, Switzerland

\*Corresponding authors: [jonathan.esguerra@med.lu.se](mailto:jonathan.esguerra@med.lu.se); [lena.eliasson@med.lu.se](mailto:lena.eliasson@med.lu.se)

## SUPPLEMENTARY FIGURES

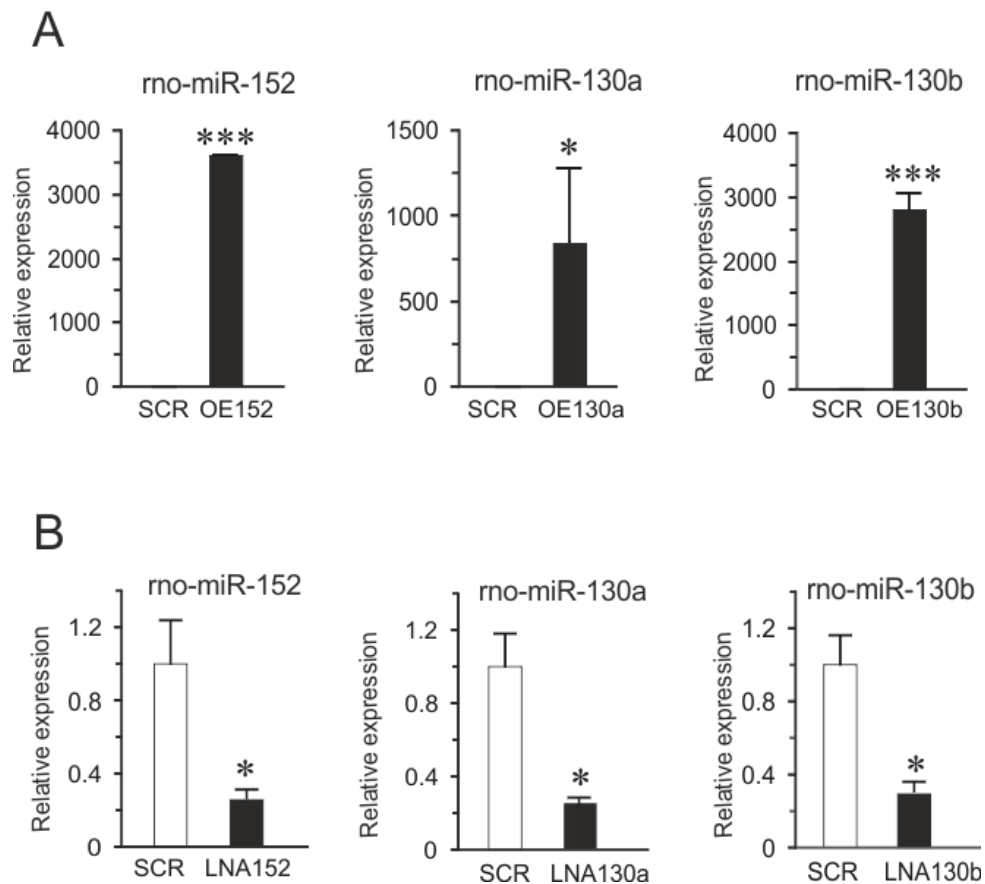

**Supplementary figure S1. Expression of miRNAs after over-expression or knock-down of miRNAs in INS-1 832/13. (A)** Expression of miRNAs after over-expression in INS-1 832/13 cells. **(B)** Knock-down of miRNAs in INS-1 832/13. Data are presented as mean  $\pm$  SEM of  $n=3$ . Students t-test, two tailed; (\*)  $p < 0.05$ , (\*\*)  $p < 0.01$ , and (\*\*\*)  $p < 0.001$ .

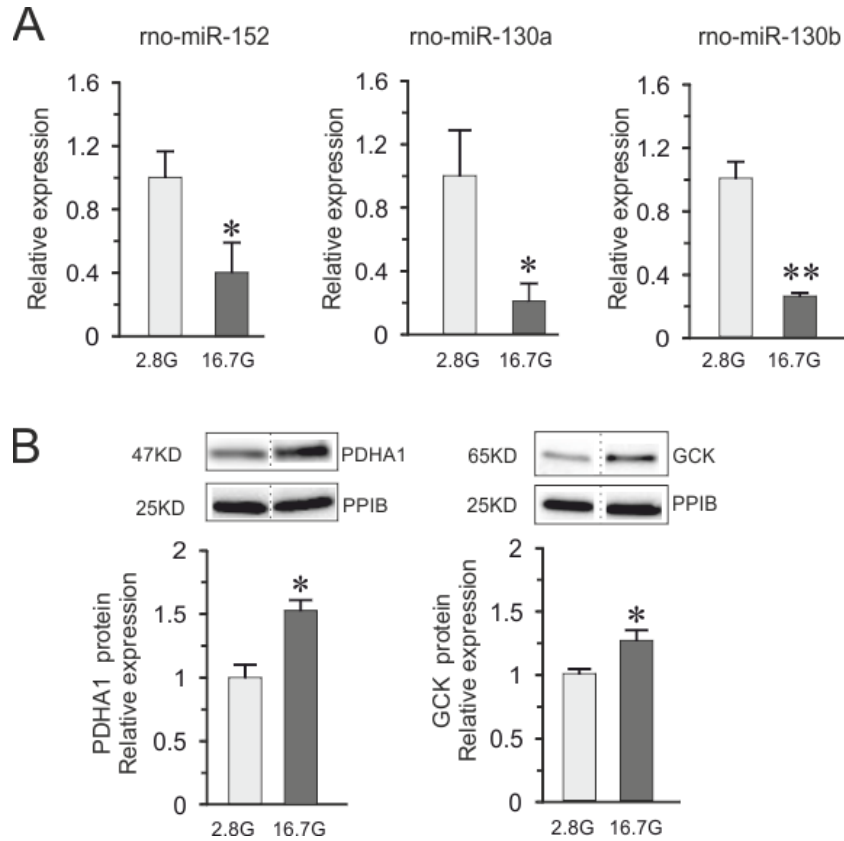

**Supplementary figure S2. Glucose-dependence of miRNAs and their putative targets, *Pdha1* and *Gck*.** (A) Expression of miRNAs and, (B) protein expression levels of PDHA1 and GCK in INS-1 832/13 incubated at 2.8 mM glucose and 16.7mM glucose for 1 hr. In each case the expression at 2.8 mM glucose was used as calibrator. Data are presented as mean± SEM. n=3, (\*)  $p < 0.05$  and (\*\*)  $p < 0.01$  vs 2.8 mM glucose using Student's 2-tailed test.

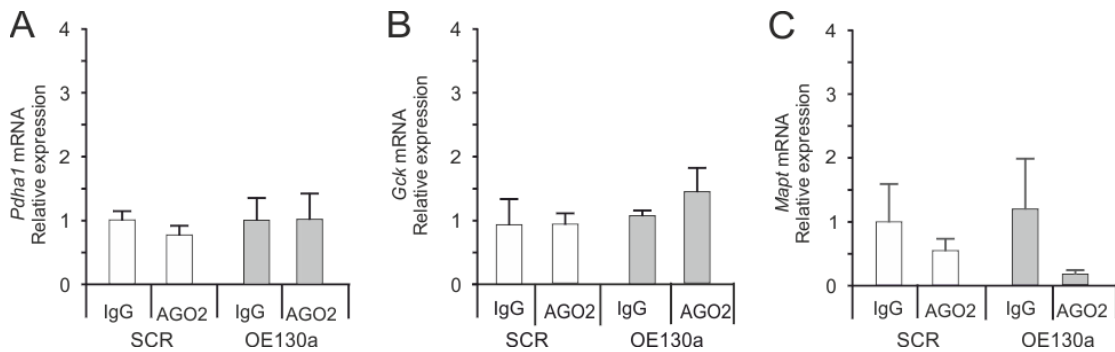

**Supplementary figure S3. RIP-AGO2 assay of miR-130a and *Pdha1* or *Gck* targeting.** Expression of 3'UTR target region of (A) *Pdha1*, (B) *Gck*, or (C) *Mapt* (non-specific control) after co-immunoprecipitation with anti-AGO2 in OE130a cells. Data are presented as mean ± SEM. n=3, Student's t-test, two tailed.

**A** Unedited blots for Figure 3A.

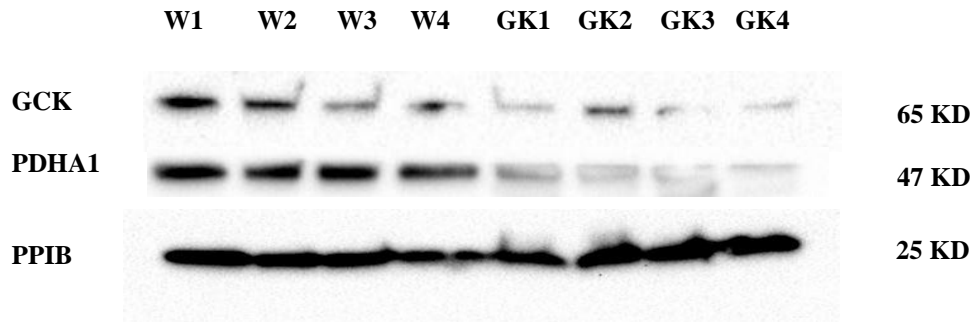

**B** Unedited blots for Figure 4B. Encircled blots/lanes used as representative in the figure.

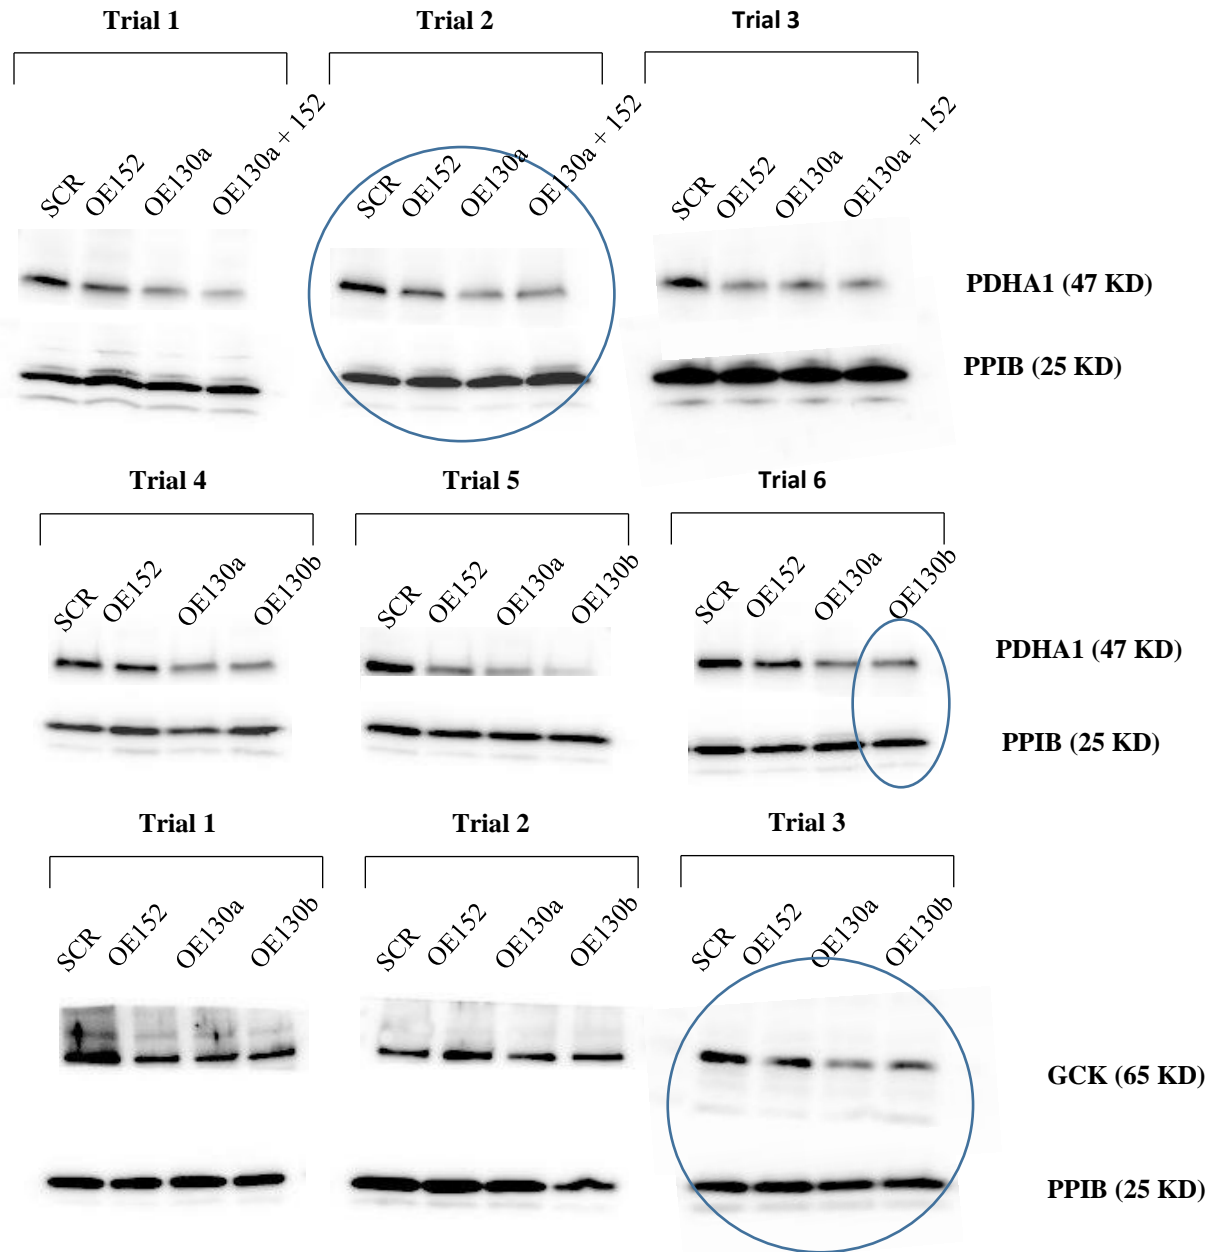

**C** Unedited blots for Figure 6A. Encircled lanes used as representative in the figure.

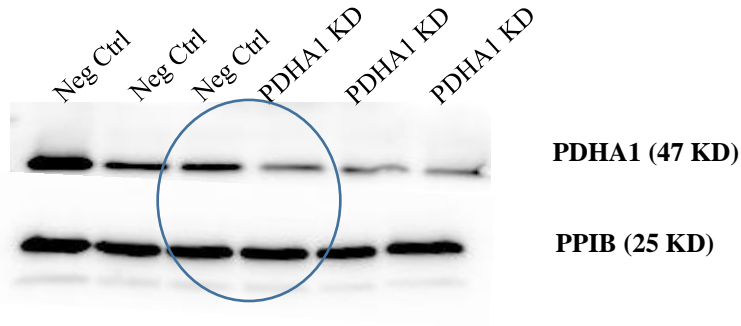

**D** Unedited blots for Supplementary figure S2B. Encircled lanes used as representative in the figure.

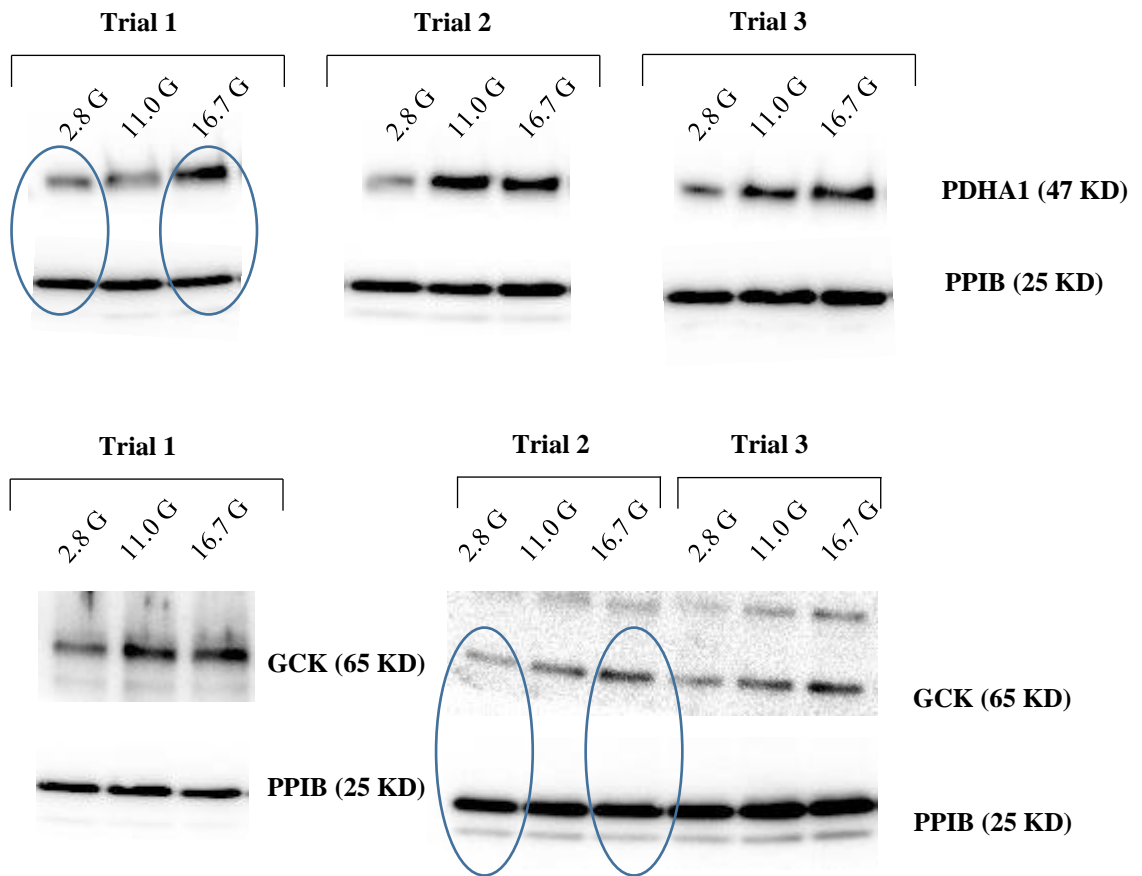

**Supplementary figure S4. Unedited blots used in the figures.** Blots were cut around the molecular weight of the protein prior to incubation with specific antibodies. Images of whole blots with molecular weight ladders were not acquired prior to cutting.

## SUPPLEMENTARY TABLES

**Supplementary Table 1. Characteristics of human pancreatic islet donors.**

|                               | <b>NGT (n=20)</b> | <b>IGT/T2D (n=22)</b> | <b>p-value</b> |
|-------------------------------|-------------------|-----------------------|----------------|
| <b>Gender (Male/Female)</b>   | 11/9              | 8/14                  |                |
| <b>HbA1c (%)</b>              | 5.4±0.08          | 6.6±0.14              | <0.0001        |
| <b>Age (years)</b>            | 55.8±2.4          | 57.7±1.8              | 0.52           |
| <b>BMI (kg/m<sup>2</sup>)</b> | 26.3±0.7          | 27.4±0.8              | 0.33           |

NGT: normal glucose tolerant; IGT: impaired glucose tolerant; T2D: type-2 diabetes

Data presented as mean ± S.E.M. Mann-Whitney U test (two-tailed).

**Supplementary Table 2. Bioinformatics prediction by miRWalk 2.0 for presence of putative miR-130a/miR-130b/miR-152 binding sites within rat Pdha1/Gck and human PDHA1/GCK.**

Web address: <http://zmf.umm.uni-heidelberg.de/apps/zmf/mirwalk2/generetsys-self.html>

Date of access: November 21, 2016.

(n.d.: no data)

| Human | EntrezID | RefseqID     | miRNA           | MIMATid      | miR Walk | Micro t4 | miRanda | mir bridge | miR DB | miR Map | miRNA Map | Pictar2 | PITA | RNA22 | RNA hybrid | Target scan | SUM | Region |
|-------|----------|--------------|-----------------|--------------|----------|----------|---------|------------|--------|---------|-----------|---------|------|-------|------------|-------------|-----|--------|
| GCK   | 2645     | NM_033508    | hsa-miR-130a-3p | MIMAT0000425 | 0        | 0        | 0       | 0          | 0      | 0       | 0         | 0       | 0    | 0     | 1          | 0           | 1   | 3UTR   |
| GCK   | 2645     | NM_000162    | hsa-miR-130a-3p | MIMAT0000425 | 0        | 0        | 0       | 0          | 0      | 0       | 0         | 0       | 0    | 0     | 1          | 0           | 1   | 3UTR   |
| GCK   | 2645     | NM_033507    | hsa-miR-130a-3p | MIMAT0000425 | 0        | 0        | 0       | 0          | 0      | 0       | 0         | 0       | 0    | 0     | 1          | 0           | 1   | 3UTR   |
| GCK   | 2645     | NM_000162    | hsa-miR-130b-3p | MIMAT0000691 | 0        | 0        | 0       | 0          | 0      | 0       | 0         | 0       | 0    | 0     | 1          | 0           | 1   | 3UTR   |
| GCK   | 2645     | NM_033507    | hsa-miR-130b-3p | MIMAT0000691 | 0        | 0        | 0       | 0          | 0      | 0       | 0         | 0       | 0    | 0     | 1          | 0           | 1   | 3UTR   |
| GCK   | 2645     | NM_033508    | hsa-miR-130b-3p | MIMAT0000691 | 0        | 0        | 0       | 0          | 0      | 0       | 0         | 0       | 0    | 0     | 1          | 0           | 1   | 3UTR   |
| GCK   | 2645     | NM_033507    | hsa-miR-152-3p  | MIMAT0000438 | 0        | 0        | 0       | 0          | 0      | 0       | 0         | 0       | 0    | 0     | 1          | 0           | 1   | 3UTR   |
| GCK   | 2645     | NM_000162    | hsa-miR-152-3p  | MIMAT0000438 | 0        | 0        | 0       | 0          | 0      | 0       | 0         | 0       | 0    | 0     | 1          | 0           | 1   | 3UTR   |
| GCK   | 2645     | NM_033508    | hsa-miR-152-3p  | MIMAT0000438 | 0        | 0        | 0       | 0          | 0      | 0       | 0         | 0       | 0    | 0     | 1          | 0           | 1   | 3UTR   |
| PDHA1 | 5160     | NM_001173455 | hsa-miR-130a-3p | MIMAT0000425 | 0        | 0        | 0       | 0          | 0      | 0       | 1         | 0       | 0    | 0     | 1          | 0           | 2   | 3UTR   |
| PDHA1 | 5160     | NM_001173456 | hsa-miR-130a-3p | MIMAT0000425 | 0        | 0        | 0       | 0          | 0      | 0       | 1         | 0       | 0    | 0     | 1          | 0           | 2   | 3UTR   |
| PDHA1 | 5160     | NM_000284    | hsa-miR-130a-3p | MIMAT0000425 | 0        | 0        | 0       | 0          | 0      | 0       | 1         | 0       | 0    | 0     | 1          | 0           | 2   | 3UTR   |
| PDHA1 | 5160     | NM_001173454 | hsa-miR-130a-3p | MIMAT0000425 | 0        | 0        | 0       | 0          | 0      | 0       | 1         | 0       | 0    | 0     | 1          | 0           | 2   | 3UTR   |
| PDHA1 | 5160     | NM_001173454 | hsa-miR-130b-3p | MIMAT0000691 | 0        | 0        | 0       | 0          | 0      | 0       | 0         | 0       | 0    | 1     | 1          | 0           | 2   | 3UTR   |
| PDHA1 | 5160     | NM_000284    | hsa-miR-130b-3p | MIMAT0000691 | 0        | 0        | 0       | 0          | 0      | 0       | 0         | 0       | 0    | 0     | 1          | 0           | 1   | 3UTR   |
| PDHA1 | 5160     | NM_001173455 | hsa-miR-130b-3p | MIMAT0000691 | 0        | 0        | 0       | 0          | 0      | 0       | 0         | 0       | 0    | 0     | 1          | 0           | 1   | 3UTR   |
| PDHA1 | 5160     | NM_001173456 | hsa-miR-130b-3p | MIMAT0000691 | 0        | 0        | 0       | 0          | 0      | 0       | 0         | 0       | 0    | 0     | 1          | 0           | 1   | 3UTR   |
| PDHA1 | 5160     | NM_001173454 | hsa-miR-152-3p  | MIMAT0000438 | 0        | 0        | 0       | 0          | 0      | 0       | 0         | 0       | 0    | 1     | 1          | 0           | 2   | 3UTR   |
| PDHA1 | 5160     | NM_001173455 | hsa-miR-152-3p  | MIMAT0000438 | 0        | 0        | 0       | 0          | 0      | 0       | 0         | 0       | 0    | 0     | 1          | 0           | 1   | 3UTR   |
| PDHA1 | 5160     | NM_001173456 | hsa-miR-152-3p  | MIMAT0000438 | 0        | 0        | 0       | 0          | 0      | 0       | 0         | 0       | 0    | 0     | 1          | 0           | 1   | 3UTR   |
| PDHA1 | 5160     | NM_000284    | hsa-miR-152-3p  | MIMAT0000438 | 0        | 0        | 0       | 0          | 0      | 0       | 0         | 0       | 0    | 0     | 1          | 0           | 1   | 3UTR   |
| GCK   | 2645     | NM_000162    | hsa-miR-130a-3p | MIMAT0000425 | 0        | 0        | 0       | n.d.       | n.d.   | n.d.    | n.d.      | n.d.    | 0    | 1     | 1          | 0           | 2   | CDS    |
| GCK   | 2645     | NM_033507    | hsa-miR-130a-3p | MIMAT0000425 | 0        | 0        | 0       | n.d.       | n.d.   | n.d.    | n.d.      | n.d.    | 0    | 0     | 1          | 0           | 1   | CDS    |
| GCK   | 2645     | NM_033508    | hsa-miR-130a-3p | MIMAT0000425 | 0        | 0        | 0       | n.d.       | n.d.   | n.d.    | n.d.      | n.d.    | 0    | 0     | 1          | 0           | 1   | CDS    |
| GCK   | 2645     | NM_033507    | hsa-miR-130b-3p | MIMAT0000691 | 0        | 0        | 0       | n.d.       | n.d.   | n.d.    | n.d.      | n.d.    | 0    | 0     | 1          | 0           | 1   | CDS    |

|       |      |              |                 |              |   |   |   |      |      |      |      |      |   |   |   |   |   |     |
|-------|------|--------------|-----------------|--------------|---|---|---|------|------|------|------|------|---|---|---|---|---|-----|
| GCK   | 2645 | NM_000162    | hsa-miR-130b-3p | MIMAT0000691 | 0 | 0 | 0 | n.d. | n.d. | n.d. | n.d. | n.d. | 0 | 0 | 1 | 0 | 1 | CDS |
| GCK   | 2645 | NM_033508    | hsa-miR-130b-3p | MIMAT0000691 | 0 | 0 | 0 | n.d. | n.d. | n.d. | n.d. | n.d. | 0 | 0 | 1 | 0 | 1 | CDS |
| GCK   | 2645 | NM_000162    | hsa-miR-152-3p  | MIMAT0000438 | 0 | 0 | 0 | n.d. | n.d. | n.d. | n.d. | n.d. | 0 | 0 | 1 | 0 | 1 | CDS |
| GCK   | 2645 | NM_033508    | hsa-miR-152-3p  | MIMAT0000438 | 0 | 0 | 0 | n.d. | n.d. | n.d. | n.d. | n.d. | 0 | 0 | 1 | 0 | 1 | CDS |
| GCK   | 2645 | NM_033507    | hsa-miR-152-3p  | MIMAT0000438 | 0 | 0 | 0 | n.d. | n.d. | n.d. | n.d. | n.d. | 0 | 0 | 1 | 0 | 1 | CDS |
| PDHA1 | 5160 | NM_000284    | hsa-miR-130a-3p | MIMAT0000425 | 0 | 0 | 0 | n.d. | n.d. | n.d. | n.d. | n.d. | 0 | 0 | 1 | 0 | 1 | CDS |
| PDHA1 | 5160 | NM_001173455 | hsa-miR-130a-3p | MIMAT0000425 | 0 | 0 | 0 | n.d. | n.d. | n.d. | n.d. | n.d. | 0 | 0 | 1 | 0 | 1 | CDS |
| PDHA1 | 5160 | NM_001173456 | hsa-miR-130a-3p | MIMAT0000425 | 0 | 0 | 0 | n.d. | n.d. | n.d. | n.d. | n.d. | 0 | 0 | 1 | 0 | 1 | CDS |
| PDHA1 | 5160 | NM_001173454 | hsa-miR-130a-3p | MIMAT0000425 | 0 | 0 | 0 | n.d. | n.d. | n.d. | n.d. | n.d. | 0 | 0 | 1 | 0 | 1 | CDS |
| PDHA1 | 5160 | NM_001173455 | hsa-miR-130b-3p | MIMAT0000691 | 0 | 0 | 0 | n.d. | n.d. | n.d. | n.d. | n.d. | 0 | 0 | 1 | 0 | 1 | CDS |
| PDHA1 | 5160 | NM_001173456 | hsa-miR-130b-3p | MIMAT0000691 | 0 | 0 | 0 | n.d. | n.d. | n.d. | n.d. | n.d. | 0 | 0 | 1 | 0 | 1 | CDS |
| PDHA1 | 5160 | NM_001173454 | hsa-miR-130b-3p | MIMAT0000691 | 0 | 0 | 0 | n.d. | n.d. | n.d. | n.d. | n.d. | 0 | 0 | 1 | 0 | 1 | CDS |
| PDHA1 | 5160 | NM_000284    | hsa-miR-130b-3p | MIMAT0000691 | 0 | 0 | 0 | n.d. | n.d. | n.d. | n.d. | n.d. | 0 | 0 | 1 | 0 | 1 | CDS |
| PDHA1 | 5160 | NM_001173456 | hsa-miR-152-3p  | MIMAT0000438 | 1 | 0 | 0 | n.d. | n.d. | n.d. | n.d. | n.d. | 0 | 0 | 1 | 1 | 3 | CDS |
| PDHA1 | 5160 | NM_001173455 | hsa-miR-152-3p  | MIMAT0000438 | 1 | 0 | 0 | n.d. | n.d. | n.d. | n.d. | n.d. | 0 | 0 | 1 | 1 | 3 | CDS |
| PDHA1 | 5160 | NM_001173454 | hsa-miR-152-3p  | MIMAT0000438 | 1 | 0 | 0 | n.d. | n.d. | n.d. | n.d. | n.d. | 0 | 0 | 1 | 1 | 3 | CDS |
| PDHA1 | 5160 | NM_000284    | hsa-miR-152-3p  | MIMAT0000438 | 1 | 0 | 0 | n.d. | n.d. | n.d. | n.d. | n.d. | 0 | 0 | 1 | 1 | 3 | CDS |

| RAT   | EntrezID | RefseqID     | miRNA           | MIMATid      | miR Walk | Micro t4 | miRanda | mir bridge | miR DB | miR Map | miRNA Map | Pictar2 | PITA | RNA22 | RNA hybrid | Target scan | SUM | Region |
|-------|----------|--------------|-----------------|--------------|----------|----------|---------|------------|--------|---------|-----------|---------|------|-------|------------|-------------|-----|--------|
| Gck   | 24385    | NM_012565    | rno-miR-130a-3p | MIMAT0000836 | 1        | 0        | 1       | 0          | 0      | 1       | 0         | 0       | 0    | 0     | 1          | 1           | 5   | 3UTR   |
| Gck   | 24385    | NM_012565    | rno-miR-130b-3p | MIMAT0000837 | 1        | 0        | 1       | 0          | 0      | 1       | 0         | 0       | 0    | 0     | 1          | 1           | 5   | 3UTR   |
| Pdha1 | 29554    | NM_001004072 | rno-miR-130a-3p | MIMAT0000836 | 0        | 0        | 0       | 0          | 0      | 1       | 0         | 0       | 0    | 0     | 1          | 1           | 3   | 3UTR   |
| Pdha1 | 29554    | NM_001004072 | rno-miR-130b-3p | MIMAT0000837 | 1        | 0        | 0       | 0          | 0      | 1       | 0         | 0       | 0    | 0     | 1          | 1           | 4   | 3UTR   |
| Pdha1 | 29554    | NM_001004072 | rno-miR-152-3p  | MIMAT0000854 | 1        | 0        | 0       | 0          | 0      | 1       | 0         | 0       | 0    | 0     | 1          | 1           | 4   | 3UTR   |
| Gck   | 24385    | NM_012565    | rno-miR-130a-3p | MIMAT0000836 | 0        | 0        | 0       | n.d.       | n.d.   | n.d.    | n.d.      | n.d.    | 0    | 0     | 1          | 0           | 1   | CDS    |
| Gck   | 24385    | NM_012565    | rno-miR-130b-3p | MIMAT0000837 | 0        | 0        | 0       | n.d.       | n.d.   | n.d.    | n.d.      | n.d.    | 0    | 0     | 1          | 0           | 1   | CDS    |
| Gck   | 24385    | NM_012565    | rno-miR-152-3p  | MIMAT0000854 | 0        | 0        | 0       | n.d.       | n.d.   | n.d.    | n.d.      | n.d.    | 0    | 0     | 1          | 0           | 1   | CDS    |
| Pdha1 | 29554    | NM_001004072 | rno-miR-130a-3p | MIMAT0000836 | 0        | 0        | 0       | n.d.       | n.d.   | n.d.    | n.d.      | n.d.    | 0    | 0     | 1          | 0           | 1   | CDS    |
| Pdha1 | 29554    | NM_001004072 | rno-miR-130b-3p | MIMAT0000837 | 0        | 0        | 0       | n.d.       | n.d.   | n.d.    | n.d.      | n.d.    | 0    | 0     | 1          | 0           | 1   | CDS    |
| Pdha1 | 29554    | NM_001004072 | rno-miR-152-3p  | MIMAT0000854 | 0        | 0        | 0       | n.d.       | n.d.   | n.d.    | n.d.      | n.d.    | 0    | 0     | 1          | 0           | 1   | CDS    |

**Supplementary Table 3. Significant Gene ontology (GO)-enriched categories for GOTERM: Metabolic Function of predicted targets unique to (A) miR-152 or (B) miR-130a/b.**

GO enrichment performed using The Database for Annotation, Visualization and Integrated Discovery (DAVID) v6.7 web server.

Web address: <https://david-d.ncifcrf.gov/>

Date of access: 22 November 2016.

**(A). Significant GO-enriched categories of targets with unique binding sites for miR-152.**

| Category         | Term                       | Count | %    | PValue   | Genes                                                                                                                                                                                                                                                                                                                                                                                                                                                                                                                                                                                                                                                                                                                                                                                                                                                                                                                                                                                                                                                                                                                                                                                                                                                                                                                                                                                                                              | List Total | Benjamini corrected Pvalue |
|------------------|----------------------------|-------|------|----------|------------------------------------------------------------------------------------------------------------------------------------------------------------------------------------------------------------------------------------------------------------------------------------------------------------------------------------------------------------------------------------------------------------------------------------------------------------------------------------------------------------------------------------------------------------------------------------------------------------------------------------------------------------------------------------------------------------------------------------------------------------------------------------------------------------------------------------------------------------------------------------------------------------------------------------------------------------------------------------------------------------------------------------------------------------------------------------------------------------------------------------------------------------------------------------------------------------------------------------------------------------------------------------------------------------------------------------------------------------------------------------------------------------------------------------|------------|----------------------------|
| GOTERM_MF_DIRECT | GO:0005515~protein binding | 197   | 10.3 | 1.33E-09 | NOG, SYT4, PDLIM5, VPS52, VPS53, ADORA1, PGR, HOOK1, BAK1, PICALM, TRAK2, WNK4, CHRNA7, SYK, F11R, SCN2B, ABCB11, SYNJ2BP, PDYN, PPARGC1A, TOX3, HES1, PIAS3, SIPA1L1, MAPK3, RYR2, PRDM2, PIAS2, EIF2AK2, BIN1, CDK5R1, MOB4, ALDOC, CACNB2, RIMS2, STX18, DMD, GIT1, GNAT1, DVL3, KIF3A, SMAD9, NDFIP1, FDXR, SMAD3, YTHDC1, KCNK3, PTPN11, KCNJ8, MAP2, CHRNB2, BEGAIN, NCOR1, SLC9A1, KCNJ16, RTN4, PPARA, LZTS3, TOLLIP, TRPV2, KCNIP3, NR2F2, ERFFI1, FGF2, SCN10A, CEP112, STX1A, STX3, RPH3AL, ARHGEF15, ARHGEF9, SLIT1, SLIT2, MYRIP, IL18BP, GNAQ, SH3KBP1, SIAH2, SNAP29, MYO5A, ATG12, USP2, FHL2, KLC2, ZBTB16, SORBS1, KLC1, KIRREL, ABCD3, APBA2, EXOC3, VMP1, KCNE3, DTNA, UBXN1, DLGAP2, YWHAB, ATP1A3, ATP1A2, CAPN2, ELAVL4, MEF2D, FYN, TENM2, HTR2A, GNA13, CAST, TSPO, SLC6A1, CASK, TBP, MAF1, ANK2, TIAM1, SLC2A3, SLC2A1, TUBG1, DDX20, KCND3, ACTN4, STMN2, RELA, BAIAP2, PRKAB1, PPP1CB, NCAM1, EP300, TIMELESS, RASGRF2, AKAP5, ERC2, CAV1, PANX1, MRAS, KCNA1, CLU, SNX1, SRF, EIF3A, MUC2, MYO1A, EPAS1, KCNB1, PODXL, OMP, FSCN1, ITGA3, PPIF, HDAC4, CDKN1A, PRICKLE1, P2RX1, BBC3, FAAH, DNMT1, IKBKB, PEX3, PAWR, FOS, CASP9, PAK1, LBR, SLC1A1, AKT2, DLG1, SOX11, ARHGAP27, LEF1, UBE2I, ESR2, TIMM23, STOM, KIF1A, KIF1B, CRKL, CARM1, KPNA1, PPP2R2A, DCC, PRKCZ, CABP1, APLP2, HSPA2, TAP1, PPP1R12A, HSPA4, SH2B1, CAMK2A, VPS39, KAT2A, TAB1, PPP1R9B, ATXN3, CYBB, CABIN1, SLC5A7, SMPD3 | 1514       | 1.8E-06                    |



|                  |                                                                                          |     |     |          |                                                                                                                                                                                                                                                                                                                                                                                                                                                                                                                                                                                                                                                                                                                                                                                                                                      |      |         |
|------------------|------------------------------------------------------------------------------------------|-----|-----|----------|--------------------------------------------------------------------------------------------------------------------------------------------------------------------------------------------------------------------------------------------------------------------------------------------------------------------------------------------------------------------------------------------------------------------------------------------------------------------------------------------------------------------------------------------------------------------------------------------------------------------------------------------------------------------------------------------------------------------------------------------------------------------------------------------------------------------------------------|------|---------|
| GOTERM_MF_DIRECT | GO:0042803~protein homodimerization activity                                             | 115 | 6.0 | 9.19E-07 | ALS2, NOG, HM13, SYT4, GDF6, LHCGR, PRKG2, TPD52, CBX5, KLHL7, BAK1, ABCB10, CHRNA7, NUDT16, PDXK, STK25, ACTN4, RELA, ZHX2, NTSR1, STK4, TOX3, HES1, EIF2AK1, HNF4A, TIMELESS, FGFR1OP, EXT2, DST, CD226, OLFM4, ACHE, SNX6, STK10, HMGCS1, SNX1, GREM2, SRF, TRIM66, RUNX1, SLC30A8, GIT1, MUC2, NADK2, IKZF2, S100A11, SMAD3, FOXP4, FOXP1, KCNK3, TIGIT, ATF3, FAAH, IKBKG, SYT14, PON1, MZF1, TDG, BEGAIN, IKBKB, TCF12, USH1G, MYO7A, DMRTA2, CCDC103, MAX, CRYL1, DGCR8, PSMC3IP, CAT, NR2F2, DPP4, CHUK, ADAM10, PRTFDC1, COL23A1, PFKM, DMRTB1, SLIT2, RAB11FIP4, STOM, RAB11FIP2, RAB11FIP3, SBF2, NPPC, CARM1, CLN6, TYRP1, SLC39A13, CABP1, DCK, RDX, ZBTB16, DROSHA, SH3GLB1, TAP1, ABCD3, HSD17B4, CAMK2A, ACSL6, FLRT3, PLEK, LRRC41, BIRC5, NPR3, STAT1, ADIPOQ, GJB1, MEF2D, TENM2, TENM3, LRP6, DPYD, ZBTB1, RNF40 | 1514 | 6.2E-04 |
| GOTERM_MF_DIRECT | GO:0032403~protein complex binding                                                       | 60  | 3.1 | 1.56E-05 | RTN4, PPARA, NOG, GNA11, MYO7A, CASK, MMP3, VPS33A, EPCAM, MAX, ANKRD54, BAG3, ATP6V0D1, CIITA, TUB, KIF11, ACTN4, RELA, RPTOR, HES1, NCOA2, EP300, NPTXR, GNAQ, SIPA1L1, PI4K2A, PEX26, AKAP5, RAD18, CPD, ERC2, BIN1, DYNC1I2, PPP2R2A, MED1, CALY, ING2, ABI2, MTHFR, DMD, SH2B3, BRK1, HSPA4, SKIL, GIT1, KIF3A, FBN1, HMBOX1, YWHAB, KCTD2, PARK2, TAB1, PPP1R9B, CDKN1A, SYDE1, FYN, TCEB1, RBPJ, RNF40, HTR2A                                                                                                                                                                                                                                                                                                                                                                                                                 | 1514 | 7.0E-03 |
| GOTERM_MF_DIRECT | GO:0000978~RNA polymerase II core promoter proximal region sequence-specific DNA binding | 55  | 2.9 | 3.91E-05 | PPARA, JDP2, ARNT2, MITF, PAX6, HOXD13, TBP, KCNIP3, PGR, FOS, ZGPAT, MAX, CREB3L2, POU4F2, RBBP4, EGR2, FOXJ2, FOXJ1, RELA, OTX1, LEF1, ESR2, SIX4, MXD1, CARF, EP300, NCOA2, PRDM5, TXK, MED1, DPF2, SRF, MSX2, CHD7, MEIS2, BCL11B, OVOL1, NFAT5, ETV1, SKIL, NFATC2, ETV6, NFATC3, SMAD3, KLF17, STAT1, FOXP4, NKX6-1, GCFC2, FOXP1, MEF2D, ATF3, MZF1, RBPJ, TCF12                                                                                                                                                                                                                                                                                                                                                                                                                                                              | 1514 | 1.3E-02 |

|                  |                                             |     |     |          |                                                                                                                                                                                                                                                                                                                                                                                                                                                                                                                                                                                                                                                                                                                                                                                                                                                                                                                                                                                                                                                                                                                                                                                                                                                                     |      |         |
|------------------|---------------------------------------------|-----|-----|----------|---------------------------------------------------------------------------------------------------------------------------------------------------------------------------------------------------------------------------------------------------------------------------------------------------------------------------------------------------------------------------------------------------------------------------------------------------------------------------------------------------------------------------------------------------------------------------------------------------------------------------------------------------------------------------------------------------------------------------------------------------------------------------------------------------------------------------------------------------------------------------------------------------------------------------------------------------------------------------------------------------------------------------------------------------------------------------------------------------------------------------------------------------------------------------------------------------------------------------------------------------------------------|------|---------|
| GOTERM_MF_DIRECT | GO:0005524~ATP binding                      | 172 | 9.0 | 5.01E-05 | RNASEL, ADCY5, STK35, ADCY6, CASK, PRKG2, CCT3, ITPKC, DMPK, DDX17, ATP2B4, WNK4, ABCB10, DDX20, ROS1, MAP2K6, SYK, MAP2K5, CIITA, NMNAT2, PDKX, ROCK1, STK25, ABCB11, ABCC12, CDKL2, STK4, MAP4K3, MYO18B, EIF2AK1, PI4K2A, MAPK3, BMP2K, EIF2AK2, KIF26A, GATC, ERBB3, GNE, STK10, PFKFB2, PEAK1, MAP4K2, MAPKAPK2, MYO9A, UHMK1, ACSBG1, QRSL1, CAMKV, TTBK1, P2RY1, LMTK2, NAT10, RUNX1, STK38L, DNAJA3, DNAJA2, NADK2, MYO1A, KIF3A, TAOK2, ATP11B, TRIO, MYO1F, YTHDC2, OXSR1, DDX5, ATP13A4, ATP7A, GLYCKT, IKBKE, DDX55, ATP2A2, P2RX1, EPHA8, KCNJ8, DYRK1B, DYRK1A, GTF2F2, RAD54L2, SMC1A, IKBKB, UBE2E2, UBE2E1, CDC42BPB, CDK17, NUAK1, ATP5B, MYO7A, PRKAG2, DDR2, CAMKK2, ACVR1C, MTHFD1, MCM9, ACVR1B, HSPH1, PDPK1, PAK2, PAK1, CHUK, AKT3, SIK3, CDK13, AKT2, KIF14, ABCE1, KIF11, CAMK1G, LIMK2, PHKG2, UBE2F, CDK6, UBE2I, UBE2H, PFKM, TTF2, IQCA1, TBCK, MCM6, MAST3, TARS, PDIK1L, ACVR2B, KIF1A, KIF1B, PANK3, HIPK1, SNRNP200, HIPK2, TXK, MYO5A, PRKCZ, BRSK2, DCK, MKNK1, CHD7, MAP3K3, HSPA2, STK40, PARS2, TAP1, TOR1B, DHX15, CHD1, ABCD3, ETNK2, HSPA4, CAMK2A, ACSL6, EHD3, MYO5B, ACSL5, TRIP13, CNNM2, DGKQ, FLT1, NLK, MSH5, PDK4, ATP1A3, STRADB, ATP1A2, FZD7, HSP90B1, FYN, HSPA4L, ABCC4, NLRP14, KATNAL1, CIT, IPPK, ATP8A1 | 1514 | 1.3E-02 |
| GOTERM_MF_DIRECT | GO:0031625~ubiquitin protein ligase binding | 49  | 2.6 | 5.04E-05 | TRAF1, DERL1, HM13, USP2, TOLLIP, CLU, PAX6, ABI2, CALR, TNFRSF1B, CUL5, KCNQ3, BTBD2, RALA, YOD1, PER3, TRAF6, UBXN1, TXNIP, GABARAPL2, EGR2, SMG5, RELA, NLK, TMBIM6, UBE2F, SMAD3, ERLIN1, UBE2I, CASC3, UBE2H, PARK2, PPARGC1A, MFN2, IKBKE, GPI, ATXN3, CDKN1A, GPR37, SIPA1L1, IKBKG, RAD18, FAF2, PIAS2, FAF1, USP25, MPHOSPH8, RNF40, BTBD11                                                                                                                                                                                                                                                                                                                                                                                                                                                                                                                                                                                                                                                                                                                                                                                                                                                                                                                | 1514 | 1.1E-02 |
| GOTERM_MF_DIRECT | GO:0030331~estrogen receptor binding        | 14  | 0.7 | 7.96E-05 | MMS19, LEF1, DDX5, PPARGC1A, NRIP1, PAGR1, DDX17, NCOA2, PSMC3IP, DNMT1, PIAS2, NCOR1, NSD1, MED1                                                                                                                                                                                                                                                                                                                                                                                                                                                                                                                                                                                                                                                                                                                                                                                                                                                                                                                                                                                                                                                                                                                                                                   | 1514 | 1.5E-02 |
| GOTERM_MF_DIRECT | GO:0019901~protein kinase binding           | 65  | 3.4 | 1.33E-04 | PRC1, ADCY6, PRKAG2, CSPG4, PAX6, CCNE2, PDPK1, KCNQ3, CDKN2B, ANK2, CASP9, TBC1D14, CHRNA7, MSN, PAK1, CRY1, ERFF1, MAP2K6, SYK, DLG1, CDK13, KIF14, ELP2, KIF11, ADAM10, RELA, PRKAB1, TPX2, PPP1CB, RPTOR, SPDYA, RAB11FIP2, EP300, RCC2, SIPA1L1, FGFR1OP, AKAP5, RYR2, CD226, MYO5A, PRKCZ, CAV1, CDK5R1, SNAP91, PFKFB2, BRSK2, GCSAM, CACNB2, SORBS1, GYS1, PPP1R12A, TRAF6, DNAJA3, TBL2, SMAD3, RICTOR, PARK2, CDC25B, HDAC4, DUSP3, PRLR, TOM1L1, RAD54L2, FAF1, IKBKB                                                                                                                                                                                                                                                                                                                                                                                                                                                                                                                                                                                                                                                                                                                                                                                    | 1514 | 2.2E-02 |

|                  |                                                     |    |     |          |                                                                                                                                                                                                                                                                                                                                                                              |      |         |
|------------------|-----------------------------------------------------|----|-----|----------|------------------------------------------------------------------------------------------------------------------------------------------------------------------------------------------------------------------------------------------------------------------------------------------------------------------------------------------------------------------------------|------|---------|
| GOTERM_MF_DIRECT | GO:0004674~protein serine/threonine kinase activity | 52 | 2.7 | 1.52E-04 | CDK17, FAM20A, NUA1, STK35, ACVR1C, CAMKK2, DMPK, ACVR1B, PDPK1, WNK4, PAK1, BRD4, AKT3, SIK3, CHUK, AKT2, SYK, LIMK2, ROCK1, CDKL2, STK4, MAST3, MAP4K3, PDIK1L, ACVR2B, HIPK1, HIPK2, MAPK3, BMP2K, EIF2AK2, PRKCZ, STK10, MAP4K2, BRSK2, MKNK1, MAPKAPK2, UHMK1, STK40, TTBK1, LMTK2, STK38L, CAMK2A, TAOK2, NLK, TRIO, OXSR1, FZD7, DYRK1B, DYRK1A, CIT, IKBKB, CDC42BPB | 1514 | 2.3E-02 |
| GOTERM_MF_DIRECT | GO:0042826~histone deacetylase binding              | 24 | 1.3 | 1.99E-04 | KAT2A, RBBP4, SMG5, RELA, YWHAB, HR, LEF1, PARK2, UHRF1BP1, SRF, NRIP1, CBX5, HES1, TAL1, MEF2D, HDAC4, DNMT1, AKAP8, DDX20, TRAF6, CRY1, NCOR1, KLF4, PHF6                                                                                                                                                                                                                  | 1514 | 2.7E-02 |

**(B). Significant GO-enriched categories of targets with unique binding sites for miR-130a/b.**

| Category         | Term                                                                    | Count | %   | PValue   | Genes                                                                                                                                                                                                                                                                                                                                                                                                                                                           | List Total | Benjamini corrected Pvalue |
|------------------|-------------------------------------------------------------------------|-------|-----|----------|-----------------------------------------------------------------------------------------------------------------------------------------------------------------------------------------------------------------------------------------------------------------------------------------------------------------------------------------------------------------------------------------------------------------------------------------------------------------|------------|----------------------------|
| GOTERM_MF_DIRECT | GO:0003700~transcription factor activity, sequence-specific DNA binding | 67    | 6.4 | 4.28E-06 | CREBRF, MEF2C, BACH1, POU6F1, SOX21, THRA, HNF1A, ELF3, GPBP1, TBX20, PPARG, PAX5, TP63, ZEB1, RORA, FOXO3, DMRTA1, ZBTB38, POU4F1, RARB, MKL2, ALX4, ALX1, AR, YY1, ZHX1, FOXN2, SPEN, TRERF1, GRHL2, MYCL, MYT1L, HOXD4, ST18, NR3C2, SOX4, ELK3, MYT1, HOXA3, TSC22D2, REL, HOXA5, NR1D2, POU2F3, POU3F3, RUNX3, ZBTB7B, IKZF4, IKZF3, KLF7, ERG, TCF7, CREBZF, TBX2, CREB1, RFX6, SMAD5, HOXB3, HOXB2, SP1, ZSCAN30, ZIC5, SP4, HIVEP2, NEUROD1, KLF2, NFIA | 825        | 0.004                      |
| GOTERM_MF_DIRECT | GO:0004842~ubiquitin-protein transferase activity                       | 34    | 3.3 | 4.09E-05 | BACH1, XIAP, RNF217, RNF216, TRIM71, ERCC8, ARIH1, ZFP91, TRIM5, G2E3, UBE2D2, KBTBD3, KLHL28, KBTBD8, HECTD2, ANKIB1, RNF11, KLHL24, KLHL42, TRAF7, RNF34, KLHL20, IPP, PEL1, MUL1, BIRC6, TRIM62, TRIM37, MIB1, KCTD10, RNF6, RNF208, KLHL15, RNF19B                                                                                                                                                                                                          | 825        | 0.019                      |
| GOTERM_MF_DIRECT | GO:0043565~sequence-specific DNA binding                                | 51    | 4.9 | 6.42E-05 | MEF2C, CREBRF, POU6F1, THRA, HNF1A, PPARG, MAEL, TP63, FOXO3, RORA, ZEB1, DMRTA1, PAX7, MKX, POU4F1, FOXB1, RARB, ALX4, ALX1, AR, YY1, FOXN2, GRHL2, BPTF, HOXC13, HOXD4, NR3C2, ELK3, ARX, HOXA3, REL, NR1D2, HOXA5, POU2F3, GBX2, POU3F3, IKZF4, IKZF3, ERG, TCF7, CREBZF, TBX2, CREB1, HOXB1, HOXB2, SP1, ZSCAN30, ZBTB4, HIVEP2, NEUROD1, KLF2                                                                                                              | 825        | 0.020                      |

---

|                  |                            |     |     |          |                                                                                                                                                                                                                                                                                                                                                                                                                                                                                                                                                                                                                                                                                                                                  |     |       |
|------------------|----------------------------|-----|-----|----------|----------------------------------------------------------------------------------------------------------------------------------------------------------------------------------------------------------------------------------------------------------------------------------------------------------------------------------------------------------------------------------------------------------------------------------------------------------------------------------------------------------------------------------------------------------------------------------------------------------------------------------------------------------------------------------------------------------------------------------|-----|-------|
| GOTERM_MF_DIRECT | GO:0005515~protein binding | 102 | 9.8 | 1.60E-04 | TGOLN2, MEF2C, LDHB, SCN3A, GRIK2, GABRB2, LMO7, RORA, CNOT7, SYP, EPC1, DAB2, MYOCD, SND1, CHRNA5, CHRNA4, RAPGEF4, RARB, RAPGEF3, AKIRIN2, EGFR, MYO6, MAGI2, YY1, WNK1, DLL1, GABRR1, RASGRF1, CLIP1, OPHN1, VAMP3, MAPK8, PTGFRN, SH3GL2, UNC13A, KALRN, DRD1, STX7, ERBB4, UMOD, PFN1, GORASP1, HNRNPD, LURAP1, WDR7, EFEMP1, TGFBR2, SNAPIN, ITGA4, SHANK2, NCKAP1, EPHA5, HDAC5, EPHA7, RAP1A, NUTF2, KAT6A, HNF1A, COPS4, PPARG, GJA1, TP63, KCNJ10, ZEB1, CLTC, GJA3, TRPV4, PLCB1, PRKCA, AR, ARHGEF11, GRM5, BTG1, TPPP, RASD1, TG, PARD3, XIAP, FKBP1A, RGS12, PEX19, TAP2, IPCEF1, PRKAA2, TRIP10, SNAP25, RASA1, TES, NCDN, CREB1, SLC12A5, DPYSL2, APPL1, ITPR1, GCK, SP1, CSNK1D, BAX, GFRA1, CALM2, NFIA, DNMT2 | 825 | 0.037 |
|------------------|----------------------------|-----|-----|----------|----------------------------------------------------------------------------------------------------------------------------------------------------------------------------------------------------------------------------------------------------------------------------------------------------------------------------------------------------------------------------------------------------------------------------------------------------------------------------------------------------------------------------------------------------------------------------------------------------------------------------------------------------------------------------------------------------------------------------------|-----|-------|

---
